# Supplementary material for: Evaporation of Methylammonium Iodide in Thermal Deposition of MAPbI3
Source: MDPI journal article supplement (doi:10.3390/nano11102532), 2021-09-28
Supplement: s1 [file s1]

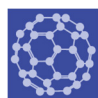

# Evaporation of Methylammonium Iodide in Thermal Deposition of MAPbI<sub>3</sub>

Ke Wang <sup>1</sup>, Benjamin Ecker <sup>1</sup>, Jinsong Huang <sup>2</sup> and Yongli Gao <sup>1,\*</sup>

<sup>1</sup> Department of Physics and Astronomy, University of Rochester, Rochester, NY 14627, USA; kwang41@ur.rochester.edu (K.W.); becker@ur.rochester.edu (B.E.)

<sup>2</sup> Department of Applied Physical Sciences, University of North Carolina at Chapel Hill, Chapel Hill, NC 27599, USA; jhuang@unc.edu

\* Correspondence: ygao@pas.rochester.edu

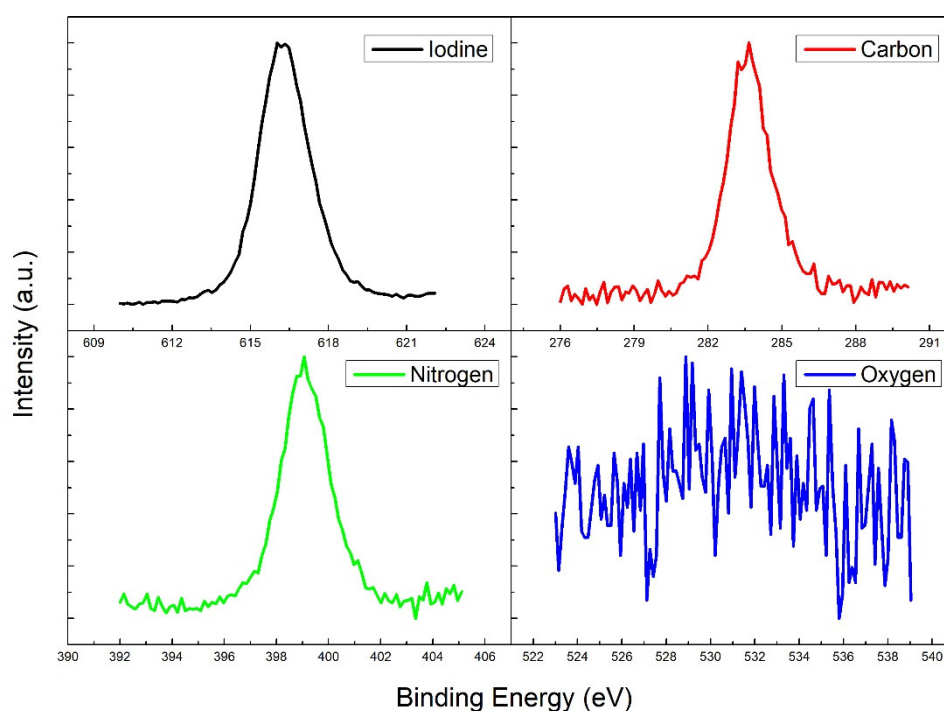

**Figure S1.** XPS spectra for iodine, carbon, nitrogen and oxygen of currently used MAI powder from our collaborator, respectively.

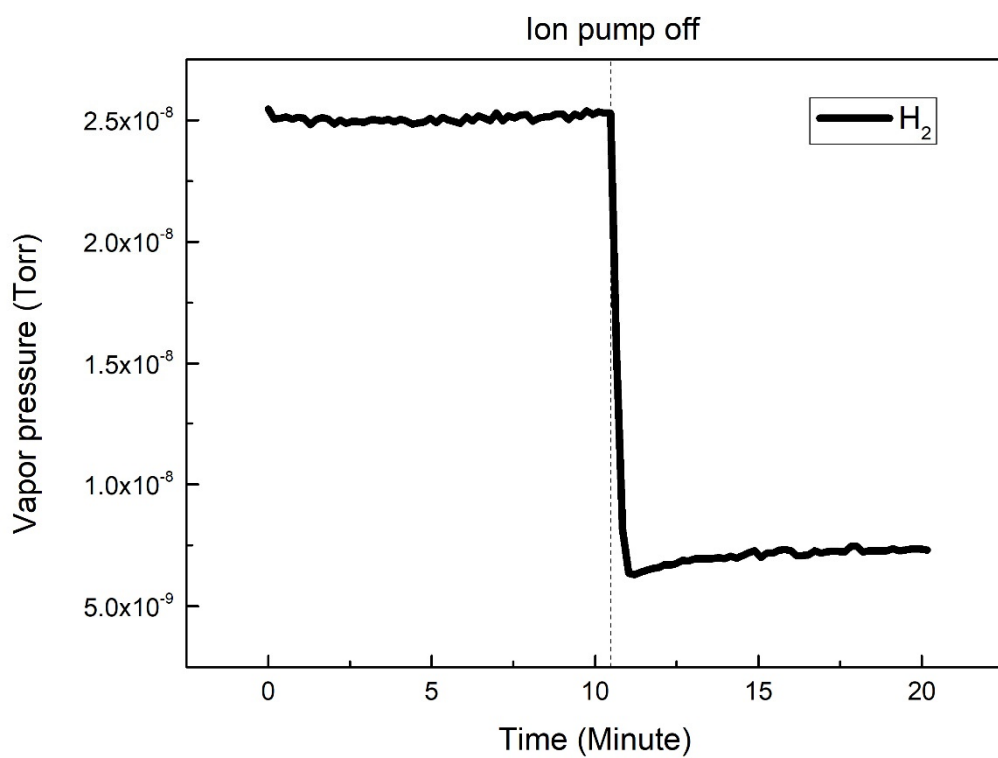

Figure S2.  $H_2$  pressure before and after turning off ion pump.

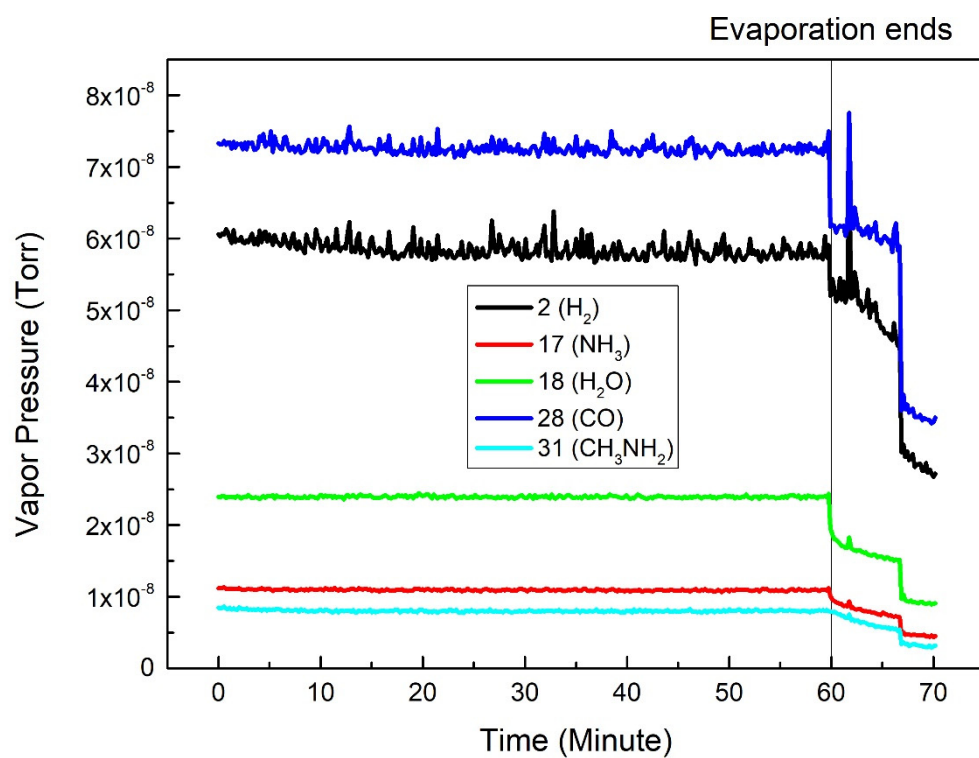

Figure S3. RGA spectra for LW/LT sample.

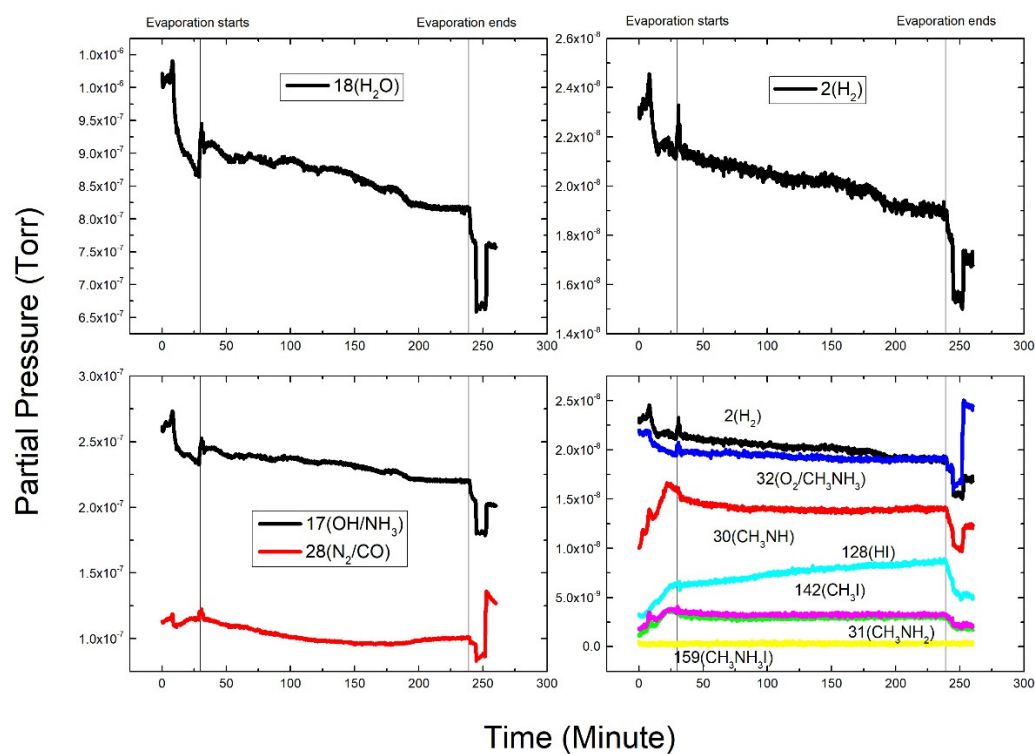

**Figure S4.** The RGA scans of the HW/LT evaporation. (a) AMU 18. (b) AMU 17 and 28. (c) AMU 2, 32, 30, 128, 142, 31 and 159. Most of the compounds went down during the evaporation since they were either participated in the reaction with water or pumped off by the turbopump. Only HI constantly went up because it did not react with water and can hardly be pumped by the turbo.

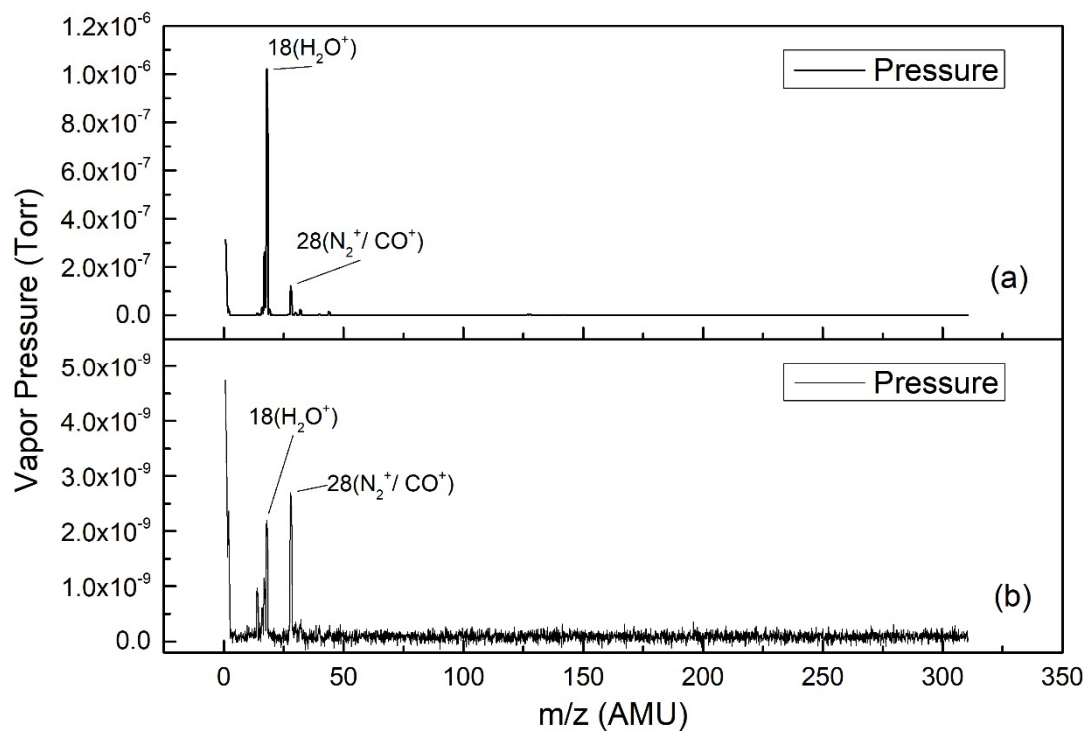

**Figure S5.** (a,b) RGA spectra of chamber environment before high water pressure (HW) evaporation and low water pressure (LW) evaporation, respectively.

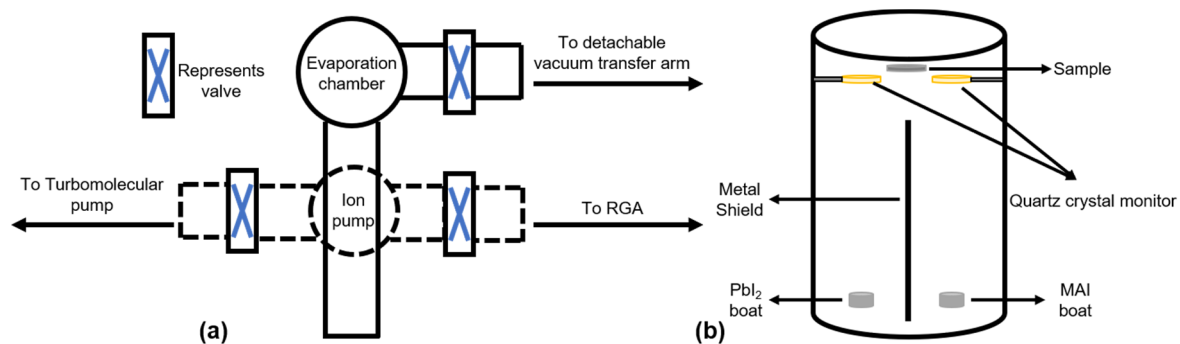

**Figure S6.** (a) Topview of evaporation chamber, the dashed components are attached to the arm from below. (b) Illustration of the configuration inside the evaporation chamber.

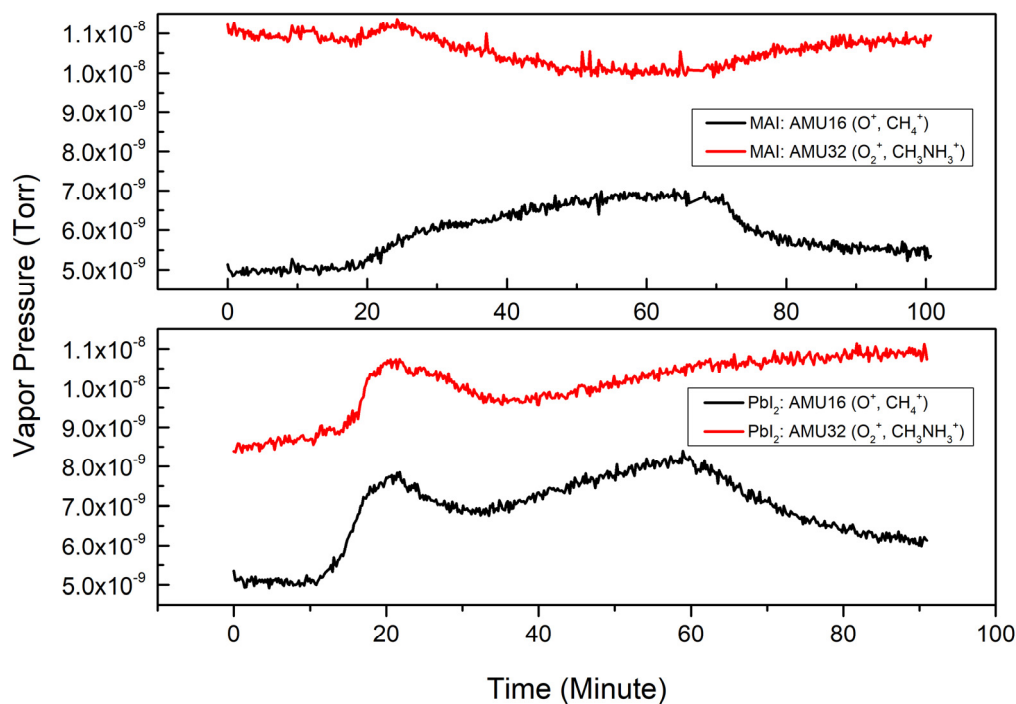

**Figure S7.** Comparison of AMU 16 and AMU 32 trend scans in MAI and PbI<sub>2</sub> evaporation. AMU 16 could be O<sup>+</sup> which is the O<sub>2</sub> fragment. AMU 32 could be O<sub>2</sub> or CH<sub>3</sub>NH<sub>3</sub><sup>+</sup>. In PbI<sub>2</sub> evaporation, AMU 16 showed a similar pattern to AMU 32, which indicates that AMU 32 and AMU 16 were mostly O<sub>2</sub> and O<sup>+</sup> respectively. By comparing the trends, the majority of the AMU 32 in MAI evaporation was CH<sub>3</sub>NH<sub>3</sub><sup>+</sup>. And it was consumed during the evaporation.

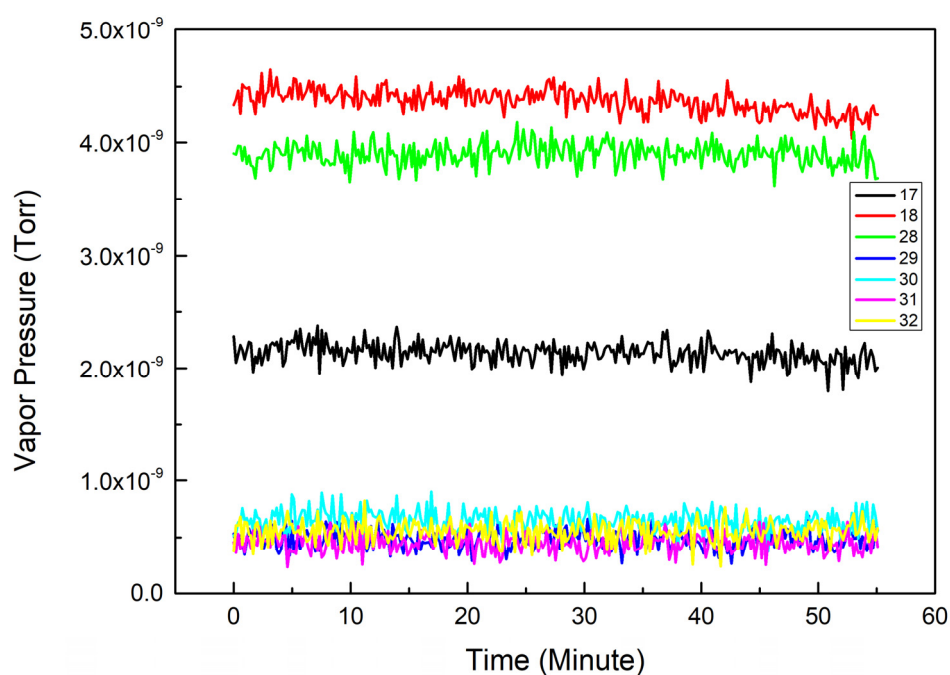

**Figure S8.** RGA spectra of selected compounds of an empty boat at 120 °C.

**Table S1.** The elemental ratio comparison of currently used MAI powder and two previous ones. Current MAI is from our collaborator. Previous #1 is from Shanghai Zhenpin limited Company. Previous #2 is from Sigma Aldrich.

| Element/Ratio | Current MAI | Previous #1 | Previous #2 |
|---------------|-------------|-------------|-------------|
| C             | 0.97        | 1.52        | 1.22        |
| N             | 0.87        | 0.94        | 0.87        |
| I             | 1           | 1           | 1           |
| O             | 0           | 0.15        | 0.19        |

**Table S2.** The elemental ratios of 10 LW/LT sample.

| Element              | Ratio |      |      |      |      |      |      |      |      |      |
|----------------------|-------|------|------|------|------|------|------|------|------|------|
| I                    | 3.42  | 3.06 | 3.09 | 3.31 | 3.11 | 3.02 | 3.18 | 2.83 | 2.93 | 3.03 |
| Pb 4f <sub>7/2</sub> | 1.00  | 1.00 | 1.00 | 1.00 | 1.00 | 1.00 | 1.00 | 1.00 | 1.00 | 1.00 |
| Pb 4f <sub>5/2</sub> | 0.77  | 0.76 | 0.77 | 0.77 | 0.77 | 0.75 | 0.79 | 0.76 | 0.79 | 0.78 |
| C (286)              | 1.27  | 1.08 | 1.01 | 1.08 | 1.10 | 1.00 | 1.06 | 0.94 | 1.03 | 0.71 |
| C (284)              | 0.72  | 0.59 | 0.81 | 0.63 | 0.76 | 0.84 | 0.77 | 0.84 | 0.61 | 0.54 |
| N                    | 1.10  | 0.77 | 0.70 | 0.91 | 0.85 | 0.78 | 0.88 | 0.47 | 0.79 | 0.51 |

**Table S3.** Comparison of AFM statistic parameters of LW and HW samples.

| Statistic parameters  | LW                        | HW                         |
|-----------------------|---------------------------|----------------------------|
| Amount of sampling    | 65536                     | 65536                      |
| Sampling area         | 25.018 $\mu\text{m}^2$    | 25.000 $\mu\text{m}^2$     |
| Mean                  | $2.88 \times 10^{-16}$ nm | $-1.02 \times 10^{-11}$ nm |
| Min                   | -8.243 nm                 | -45.606 nm                 |
| Max                   | 10.974 nm                 | 33.493 nm                  |
| Peak-to-peak          | 19.218 nm                 | 79.099 nm                  |
| Root mean square, RMS | 2.075 nm                  | 13.781 nm                  |
| Roughness average     | 1.548 nm                  | 11.428 nm                  |
| Skewness, Ssk         | 0.260                     | -0.619                     |
| Kurtosis, Ska         | 4.592                     | 2.780                      |
